# Supplementary material for: Konstruktion und explorative Analysen zur Güte des Inventars zur Erfassung von Achtsamkeit bei Jugendlichen
Source: Atypon-hosted journal article supplement (doi:10.1026/0012-1924/a000331), 2024-04-08
Supplement: 0012-1924_a000331_esm1.pdf [file 0012-1924_a000331_esm1.pdf]

## ESM 1. Übersicht über bisherige publizierte Selbstberichts-Fragebögen zur Erfassung von Achtsamkeit bei Jugendlichen

| Fragebogen | Zielgruppe (Alter) | Definition Achtsamkeit                                                                                                                                          | Anzahl Faktoren | Anzahl Items | Validierung                                                                                          | Item-Wording      | Kriteriumsvalidität <sup>a-c</sup>                                                                                                                                                                                                                                                                                                                                                                                                                                                                                                                                 |
|------------|--------------------|-----------------------------------------------------------------------------------------------------------------------------------------------------------------|-----------------|--------------|------------------------------------------------------------------------------------------------------|-------------------|--------------------------------------------------------------------------------------------------------------------------------------------------------------------------------------------------------------------------------------------------------------------------------------------------------------------------------------------------------------------------------------------------------------------------------------------------------------------------------------------------------------------------------------------------------------------|
| MAAS – A   | 14-18              | Bewusstheit für die gegenwärtige Erfahrung, empfänglicher Status von Aufmerksamkeit                                                                             | 1               | 14           | niederländisch, englisch (USA)                                                                       | negativ           | <u>negativ korreliert:</u><br>Neurotizismus, negativer Affekt, Substanzmissbrauch, Stress, Rumination, Katastrophisieren<br><u>positiv korreliert:</u><br>Gewissenhaftigkeit, Verträglichkeit, Offenheit für Erfahrung, Lebenszufriedenheit, positiver Affekt, Lebensqualität <sup>a</sup>                                                                                                                                                                                                                                                                         |
| MAAS – C   | 9-13               | s. MAAS-A                                                                                                                                                       | 1               | 15           | englisch (Kanada)                                                                                    | negativ           | <u>negativ korreliert:</u><br>Ängstlichkeit, negativer Affekt, Depression, Rumination<br><u>positiv korreliert:</u><br>Schul-Selbstkonzept, Optimismus, Autonomie im Klassenraum, positiver Affekt, Akademische Ziele <sup>b</sup>                                                                                                                                                                                                                                                                                                                                 |
| CAMM       | 10-17              | Gegenwärtige Bewusstheit & nicht-urteilende, nicht-vermeidende Haltung gegenüber Gedanken und Gefühlen                                                          | 1               | 10           | englisch (USA; Australien), niederländisch, spanisch, französisch, italienisch, türkisch, griechisch | negativ           | <u>negativ korreliert:</u><br>externalisierende/ internalisierende Probleme, Stress, somatische Beschwerden, Rumination, Katastrophisieren, Sorgen, negativer Affekt, Selbstverachtung, emotionale Intelligenz, Lebensqualität, Familiengewalt, Sexueller Missbrauch, Depression, Psychologische Inflexibilität, Emotionsregulation, Moral Disengagement<br><u>positiv korreliert:</u><br>Wohlbefinden, Selbstwert, Akademische Kompetenz, Lebensqualität, Soziale Fähigkeiten, Selbst-Regulation, somatische Beschwerden, Resilienz, Selbstmitgefühl <sup>c</sup> |
| CHIME-A    | 12-14              | Bewusstsein für äußere Erfahrungen, Bewusstsein für innere Erfahrungen, Bewusstes Handeln, akzeptierende und nicht-urteilende Haltung, Dezentrierung und Nicht- | 8               | 25           | englisch (Australien), türkisch                                                                      | positiv & negativ | <u>negativ korreliert:</u><br>emotionale Dysregulation, Perfektionismus, negativer Affekt, Depression, Ängstlichkeit, Gewichts-/Figur-bezogene Sorgen<br><u>positiv korreliert:</u><br>Wohlbefinden <sup>d</sup>                                                                                                                                                                                                                                                                                                                                                   |

|        |       |                                                                                             |   |    |                |                   |                                                                                                                                                                                                                                                                                |
|--------|-------|---------------------------------------------------------------------------------------------|---|----|----------------|-------------------|--------------------------------------------------------------------------------------------------------------------------------------------------------------------------------------------------------------------------------------------------------------------------------|
|        |       | Reaktivität, Offenheit für Erfahrungen, Relativität der Gedanken, einfühlsames Verstehen    |   |    |                |                   |                                                                                                                                                                                                                                                                                |
| FFMQ-A | 10-18 | Beobachten, Beschreiben, Bewusstes Handeln, Akzeptieren, nicht-urteilend, Nicht-Reaktivität | 5 | 25 | englisch (USA) | positiv & negativ | <u>negativ korreliert:</u><br>externalisierende/ internalisierende Probleme, Aufmerksamkeitsprobleme, negativer Affekt, Stress, negativer Affekt, Rumination<br><u>positiv korreliert:</u><br>Selbstkontrolle, Begeisterungsfähigkeit, Lebenszufriedenheit, positiver Affekt ° |

*Anmerkungen:* CAMM = Child and Adolescent Mindfulness Measure (Greco, Baer & Smith, 2011). MAAS-A = Mindful Attention Awareness Scale for Adolescents (Brown, West, Loverich & Biegel, 2011). MAAS-C = Mindful Awareness Scale for Children (Lawlor, Schonert-Reichl, Gadermann & Zumbo, 2014). CHIME-A = Comprehensive Inventory of Mindfulness Experience-Adolescents (Johnson, Burke, Brinkman & Wade, 2017). FFMQ-A = Five Facet Mindfulness Questionnaire – Adolescents (Cortazar, Calvete, Fernández-González & Orue, 2020).

<sup>a</sup>(Brown et al., 2011; de Bruin, Zijlstra, van de Weijer-Bergsma & Bögels, 2011) <sup>b</sup>(Lawlor et al., 2014) <sup>c</sup>(Bruin, Zijlstra & Bögels, 2013; Dion, Paquette, Daigneault, Godbout & Hébert, 2018; García-Rubio et al., 2019; Greco et al., 2011; Kuby, McLean & Allen, 2015; Roux, Franckx, Lahaye, Deplus & Philippot, 2019; Saggino et al., 2017; Sünbül, 2018; Theofanous, Ioannou, Zacharia, Georgiou & Karekla, 2020; Viñas, Malo, González, Navarro & Casas, 2015) <sup>d</sup>(Johnson et al., 2017; Kırcı & Ekşi, 2018) <sup>e</sup>(Abujaradeh, Colaianne, Roeser, Tsukayama & Galla, 2020; Cortazar et al., 2020)

## Literatur

- Abujaradeh, H., Colaianne, B. A., Roeser, R. W., Tsukayama, E. & Galla, B. M. (2020). Evaluating a short-form Five Facet Mindfulness Questionnaire in adolescents: Evidence for a four-factor structure and invariance by time, age, and gender. *International Journal of Behavioral Development, 44*(1), 20–30.  
<https://doi.org/10.1177/0165025419873039>
- Brown, K. W., West, A. M., Loverich, T. M. & Biegel, G. M. (2011). Assessing adolescent mindfulness: Validation of an Adapted Mindful Attention Awareness Scale in adolescent normative and psychiatric populations. *Psychological Assessment, 23*(4), 1023–1033. US: American Psychological Association.  
<https://doi.org/10.1037/a0021338>
- de Bruin, E. I., Zijlstra, B. J. H., van de Weijer-Bergsma, E. & Bögels, S. M. (2011). The Mindful Attention Awareness Scale for Adolescents (MAAS-A): Psychometric properties in a Dutch sample. *Mindfulness, 2*(3), 201–211.  
<https://doi.org/10.1007/s12671-011-0061-6>
- Bruin, E., Zijlstra, B. & Bögels, S. (2013). The meaning of mindfulness in children and adolescents: Further validation of the Child and Adolescent Mindfulness Measure (CAMM) in two independent samples from the Netherlands. *Mindfulness, 5*.  
<https://doi.org/10.1007/s12671-013-0196-8>
- Cortazar, N., Calvete, E., Fernández-González, L. & Orue, I. (2020). Development of a short form of the Five Facet Mindfulness Questionnaire–Adolescents for children and adolescents. *Journal of Personality Assessment, 102*(5), 641–652.  
<https://doi.org/10.1080/00223891.2019.1616206>
- Dion, J., Paquette, L., Daigneault, I., Godbout, N. & Hébert, M. (2018). Validation of the French version of the Child and Adolescent Mindfulness Measure (CAMM) among

samples of French and indigenous youth. *Mindfulness*, 9(2), 645–653.

<https://doi.org/10.1007/s12671-017-0807-x>

García-Rubio, C., Rodríguez-Carvajal, R., Langer, A. I., Paniagua, D., Steinebach, P., Andreu, C. I. et al. (2019). Validation of the Spanish Version of the Child and Adolescent Mindfulness Measure (CAMM) with samples of Spanish and Chilean children and adolescents. *Mindfulness*, 10(8), 1502–1517. <https://doi.org/10.1007/s12671-019-01108-8>

Greco, L. A., Baer, R. A. & Smith, G. T. (2011). Assessing mindfulness in children and adolescents: Development and validation of the Child and Adolescent Mindfulness Measure (CAMM). *Psychological Assessment*, 23(3), 606–614.  
<https://doi.org/10.1037/a0022819>

Johnson, C., Burke, C., Brinkman, S. & Wade, T. (2017). Development and validation of a multifactor mindfulness scale in youth: The Comprehensive Inventory of Mindfulness Experiences–Adolescents (CHIME-A). *Psychological Assessment*, 29(3), 264–281.  
<https://doi.org/10.1037/pas0000342>

Kırca, B. & Ekşi, H. (2018). Turkish adaptation of the comprehensive inventory of mindfulness experiences- adolescents: A reliability and validity study. (E. Masal, I. Önder, H. Çalışkan & S. Beşoluk, Hrsg.) *SHS Web of Conferences*, 48, 01038.  
<https://doi.org/10.1051/shsconf/20184801038>

Kuby, A. K., McLean, N. & Allen, K. (2015). Validation of the Child and Adolescent Mindfulness Measure (CAMM) with non-clinical adolescents. *Mindfulness*, 6(6), 1448–1455. <https://doi.org/10.1007/s12671-015-0418-3>

Lawlor, M. S., Schonert-Reichl, K. A., Gadermann, A. M. & Zumbo, B. D. (2014). A validation study of the Mindful Attention Awareness Scale adapted for children. *Mindfulness*, 5(6), 730–741. <https://doi.org/10.1007/s12671-013-0228-4>

- Roux, B., Franckx, A.-C., Lahaye, M., Deplus, S. & Philippot, P. (2019). A French validation of the Child and Adolescent Mindfulness Measure (CAMM). *European Review of Applied Psychology*, 69(3), 83–89. <https://doi.org/10.1016/j.erap.2019.06.001>
- Saggino, A., Bartoccini, A., Sergi, M. R., Romanelli, R., Macchia, A. & Tommasi, M. (2017). Assessing mindfulness on samples of Italian children and adolescents: the validation of the Italian version of the Child and Adolescent Mindfulness Measure. *Mindfulness*, 8(5), 1364–1372. <https://doi.org/10.1007/s12671-017-0712-3>
- Sünbül, Z. A. (2018). Psychometric evaluation of Child and Adolescent Mindfulness Measure (CAMM) with turkish sample. *Online Submission*, 7(2), 56–59.
- Theofanous, A., Ioannou, M., Zacharia, M., Georgiou, S. N. & Karekla, M. (2020). Gender, age, and time invariance of the Child and Adolescent Mindfulness Measure (CAMM) and psychometric properties in three Greek-speaking youth samples. *Mindfulness*, 11(5), 1298–1307. <https://doi.org/10.1007/s12671-020-01350-5>
- Viñas, F., Malo, S., González, M., Navarro, D. & Casas, F. (2015). Assessing mindfulness on a sample of Catalan-speaking Spanish adolescents: Validation of the Catalan version of the Child and Adolescent Mindfulness Measure. *The Spanish Journal of Psychology*, 18, E46. <https://doi.org/10.1017/sjp.2015.48>
