# Supplementary material for: Konstruktion und explorative Analysen zur Güte des Inventars zur Erfassung von Achtsamkeit bei Jugendlichen
Source: Atypon-hosted journal article supplement (doi:10.1026/0012-1924/a000331), 2024-04-08
Supplement: 0012-1924_a000331_esm2.pdf [file 0012-1924_a000331_esm2.pdf]

## ESM 2. MindYou-Itempool

| Nr. | Item aus dem MindYou-Itempool                                                                                                         | Messinstrument & ursprüngliches Item                                                                                                                                                                                                                                                                                                                          | Grund der Veränderung | Polung |
|-----|---------------------------------------------------------------------------------------------------------------------------------------|---------------------------------------------------------------------------------------------------------------------------------------------------------------------------------------------------------------------------------------------------------------------------------------------------------------------------------------------------------------|-----------------------|--------|
| 1   | Im Alltag werde ich durch viele Erinnerungen, Bilder oder Träumereien abgelenkt. <sup>a</sup>                                         | CHIME (Item 17)                                                                                                                                                                                                                                                                                                                                               | -                     | -      |
| 2   | Ich weiß genau, wie ich mich gerade fühle.                                                                                            | CHIME (Item 34): Es ist mir im Alltag bewusst, wie ich mich gerade fühle.                                                                                                                                                                                                                                                                                     | KON                   | +      |
| 3   | Auch wenn Dinge schief laufen, bin ich mir selbst gegenüber freundlich.                                                               | FMI (Item 9): Ich bin mir selbst gegenüber freundlich, wenn Dinge schief laufen.                                                                                                                                                                                                                                                                              | ID                    | +      |
| 4   | Beim Sitzen oder Liegen spüre ich bewusst wie mein Körper den Boden oder Stuhl berührt.                                               | CHIME (Item 5): Beim Sitzen oder Liegen nehme ich meine Körperempfindungen wahr.                                                                                                                                                                                                                                                                              | SYN                   | +      |
| 5   | Wenn ich mir Sorgen mache, fällt es mir schwer mich auf das zu konzentrieren, was gerade passiert.                                    |                                                                                                                                                                                                                                                                                                                                                               |                       | -      |
| 6   | Ich denke, dass ich manche meiner Gefühle (Angst, Wut, Trauer) nicht haben sollte.                                                    | FFMQ (Item 30): Ich denke, dass manche meiner Gefühle schlecht oder unangebracht sind, und dass ich sie nicht haben sollte<br>CAMM (Item 9): I think that some of my feelings are bad and that I shouldn't have them.                                                                                                                                         | KÜR/KON               | -      |
| 7   | Wenn ich Schmerzen habe, versuche ich diese auszublenden und zu ignorieren.                                                           | CHIME (Item 33): Wenn ich Schmerzen habe, versuche ich diese Wahrnehmung möglichst zu vermeiden.                                                                                                                                                                                                                                                              | SYN                   | -      |
| 8   | Ich schaffe es von unangenehmen Gedanken Abstand zu nehmen. Ich bemerke sie und lasse mich davon aber nicht überwältigen.             | FFMQ (Item 19): Wenn ich belastende Gedanken oder Vorstellungen habe, kann ich von diesen Abstand nehmen und bin mir der Gedanken oder Vorstellungen bewusst, ohne dass ich von ihnen überwältigt werde<br>CHIME (Item 20): Wenn ich in Gedanken und Gefühlen gefangen bin, dauert es nicht lange, bis ich das merke und mich wieder davon distanzieren kann. | SYN/KON               | +      |
| 9   | Ich weiß genau wie es sich in meinem Körper anfühlt wütend, traurig oder ängstlich zu sein.                                           |                                                                                                                                                                                                                                                                                                                                                               |                       | +      |
| 10  | Mir fällt es leicht, mich nur auf eine Sache zu konzentrieren (z.B. essen, Zähne putzen, Hausaufgaben machen).                        |                                                                                                                                                                                                                                                                                                                                                               |                       | +      |
| 11  | Wenn ich bei mir unangenehme Gefühle oder Gedanken spüre, schaffe ich es trotzdem, mich darauf zu konzentrieren, was gerade passiert. |                                                                                                                                                                                                                                                                                                                                                               |                       | +      |

|    |                                                                                                                              |                                                                                                                             |     |   |
|----|------------------------------------------------------------------------------------------------------------------------------|-----------------------------------------------------------------------------------------------------------------------------|-----|---|
| 12 | Es fällt mir leicht, mich darauf zu konzentrieren, was ich gerade tue.                                                       | CHIME (Item 12): Es fällt mir leicht, mich darauf zu konzentrieren, was ich tue.                                            | ID  | + |
| 13 | Ich zerbreche oder verschütte Dinge aus Unachtsamkeit oder weil ich an etwas anderes denke.                                  | CHIME (Item 10): Ich zerbreche oder verschütte Dinge aus Unachtsamkeit oder weil ich an anderes denke.                      | ID  | - |
| 14 | Beim Lesen muss ich Abschnitte wiederholt lesen, weil ich an etwas anderes gedacht habe. <sup>a</sup>                        | MAAS (Item 2)<br>CHIME (Item 26)                                                                                            | -   | - |
| 15 | Wenn Veränderungen in meinem Körper passieren, wie z.B. schnelleres oder langsames Atmen, spüre ich das bewusst.             | CHIME (Item 29): Ich nehme Veränderungen in meinem Körper deutlich wahr, z.B. schnelleres oder langsames Atmen.             | SYN | + |
| 16 | Ich bin enttäuscht von mir, wenn ich es nicht schaffe mich zu konzentrieren.                                                 |                                                                                                                             |     | - |
| 17 | Wenn mich Wut überkommt, muss ich sofort reagieren.                                                                          | CHIME (Item 16): In schwierigen Situationen kann ich einen Moment innehalten, ohne sofort zu reagieren.                     | KON | - |
| 18 | Ich glaube, dass ich einige meiner Gedanken nicht haben sollte.                                                              | FFMQ (Item 14): Ich glaube, dass einige meiner Gedanken unnormal sind, und dass ich nicht so denken sollte.                 | KÜR | - |
| 19 | Ich mag es nicht ärgerlich, traurig oder ängstlich zu sein und versuche solche Gefühle beiseite zu schieben.                 | CHIME (Item 30): Ich mag es nicht, wenn ich ärgerlich oder ängstlich bin und versuche, solche Gefühle beiseite zu schieben. | ERG | - |
| 20 | Ich nehme Geräusche in meiner Umgebung, wie z.B. zwitschernde Vögel oder fahrende Autos, bewusst wahr.                       | CHIME (Item 18): Wenn ich Auto oder Zug fahre, bin ich mir meiner Umgebung, z.B. der Landschaft, bewusst.                   | KON | + |
| 22 | Ich bin abgelenkt, weil ich über vieles nachdenke, was in der Vergangenheit passiert ist oder zukünftig passieren wird.      | MAAS (Item 13): Mir fällt auf, wie ich über die Zukunft oder Vergangenheit grübele.                                         | ERG | - |
| 23 | Wenn sich meine Laune verändert, merke ich das sofort.                                                                       | CHIME (Item 1): Wenn sich meine Stimmung verändert, merke ich das sofort.                                                   | SYN | + |
| 24 | Wenn ich merke, dass meine Gedanken woanders waren, kann ich mich wieder schnell auf das konzentrieren, was gerade passiert. | FMI (Item 3): Wenn ich merke, dass ich abwesend war, kehre ich sanft zur Erfahrung des Augenblicks zurück.                  | KON | + |
| 25 | Ich nehme mir meine Fehler und Schwächen übel. <sup>a</sup>                                                                  | CHIME (Item 36)                                                                                                             | -   | - |
| 26 | In schwierigen Situationen bleibe ich ruhig. <sup>a</sup>                                                                    | FMI (Item 11)                                                                                                               | -   | + |

|    |                                                                                                |                                                                                                                        |     |   |
|----|------------------------------------------------------------------------------------------------|------------------------------------------------------------------------------------------------------------------------|-----|---|
| 31 | Mir fällt auf, dass ich anderen Personen nicht richtig zuhöre, wenn ich mit ihnen spreche.     | MAAS (Item 11): Mir fällt auf, wie ich jemandem mit einem Ohr zuhöre, während ich zur selben Zeit etwas anderes tue.   | KON | - |
| 27 | Ich bin abgelenkt, weil ich immer wieder an dasselbe denken muss.                              |                                                                                                                        |     | - |
| 28 | Ich bemerke erst nach einer Weile, wenn meine Gedanken abschweifen.                            |                                                                                                                        |     | - |
| 29 | Wenn ich an etwas Unangenehmes denke, versuche ich diesen Gedanken nicht zuzulassen.           |                                                                                                                        |     | - |
| 30 | Wenn ich etwas nicht schaffe, das ich mir vorgenommen habe, bin ich trotzdem nett zu mir.      |                                                                                                                        |     | + |
| 31 | Mir fällt auf, dass ich anderen Personen nicht richtig zuhöre, wenn ich mit ihnen spreche.     | MAAS (Item 11) Mir fällt auf, wie ich jemandem mit einem Ohr zuhöre, während ich zur selben Zeit etwas anderes tue.    | KON | - |
| 32 | Ich versuche mich abzulenken, wenn ich unangenehme Gefühle habe.                               | CHIME (Item 22): Ich versuche mich abzulenken, wenn ich unangenehme Gefühle erlebe.                                    | SYN | - |
| 33 | Wenn mich etwas beunruhigt, beschäftigt mich das immer wieder.                                 |                                                                                                                        |     | - |
| 34 | Ich kann gelassen mit Streit und Ärger umgehen.                                                |                                                                                                                        |     | + |
| 35 | Ich nehme Formen und Farben in der Natur deutlich und bewusst wahr. <sup>a</sup>               | CHIME (Item 9)                                                                                                         | -   | + |
| 36 | Ich kann nicht genau sagen, worüber ich nachdenke.                                             |                                                                                                                        |     | - |
| 37 | Ich spüre bewusst Dinge wie z.B. den Wind in meinem Haar oder Sonnenschein auf meinem Gesicht. | CHIME (Item 21): Ich achte auf Empfindungen wie zum Beispiel Wind in meinem Haar oder Sonnenschein auf meinem Gesicht. | KON | + |

*Anmerkungen:* KON = Konkretisierung der Items. SYN = Wortveränderungen wurden vorgenommen/ sprachlich einfachere Synonyme ersetzt. ERG = Ergänzungen. KÜR = Items wurden gekürzt. ID = weitgehend identisch. <sup>a</sup> Original-Item des jeweiligen Messinstrumentes: CHIME (Bergomi, Tschacher & Kupper, 2014); FMI/FFA (Walach, Buchheld, Buttenmüller, Kleinknecht & Schmidt, 2006); MAAS (Brown & Ryan, 2003; Michalak, Heidenreich, Ströhle & Nachtigall, 2011); FFMQ (Baer, Smith, Hopkins, Krietemeyer & Toney, 2006; Michalak et al., 2016); CAMM (Greco, Baer & Smith, 2011)

## Literatur

- Baer, R. A., Smith, G. T., Hopkins, J., Krietemeyer, J. & Toney, L. (2006). Using self-report assessment methods to explore facets of mindfulness. *Assessment, 13*(1), 27–45.  
<https://doi.org/10.1177/1073191105283504>
- Bergomi, C., Tschacher, W. & Kupper, Z. (2014). Konstruktion und erste Validierung eines Fragebogens zur umfassenden Erfassung von Achtsamkeit: Das Comprehensive Inventory of Mindfulness Experiences. *Diagnostica, 60*(3), 111–125.  
<https://doi.org/10.1026/0012-1924/a000109>
- Brown, K. W. & Ryan, R. M. (2003). The benefits of being present: Mindfulness and its role in psychological well-being. *Journal of Personality and Social Psychology, 84*(4), 822–848. <https://doi.org/10.1037/0022-3514.84.4.822>
- Greco, L. A., Baer, R. A. & Smith, G. T. (2011). Assessing mindfulness in children and adolescents: Development and validation of the Child and Adolescent Mindfulness Measure (CAMM). *Psychological Assessment, 23*(3), 606–614.  
<https://doi.org/10.1037/a0022819>
- Michalak, J., Heidenreich, T., Ströhle, G. & Nachtigall, C. (2011). MAAS - Mindful Attention and Awareness Scale - deutsche Version. ZPID (Leibniz Institute for Psychology Information) – Testarchiv. <https://doi.org/10.23668/PSYCHARCHIVES.393>
- Michalak, J., Zarbock, G., Drews, M., Otto, D., Mertens, D., Ströhle, G. et al. (2016). Erfassung von Achtsamkeit mit der deutschen Version des Five Facet Mindfulness Questionnaires (FFMQ-D). *Zeitschrift für Gesundheitspsychologie, 24*(1), 1–12.  
<https://doi.org/10.1026/0943-8149/a000149>
- Walach, H., Buchheld, N., Buttenmüller, V., Kleinknecht, N. & Schmidt, S. (2006). Measuring mindfulness—the Freiburg Mindfulness Inventory (FMI). *Personality and Individual Differences, 40*(8), 1543–1555. <https://doi.org/10.1016/j.paid.2005.11.025>
