# Supplementary material for: Konstruktion und explorative Analysen zur Güte des Inventars zur Erfassung von Achtsamkeit bei Jugendlichen
Source: Atypon-hosted journal article supplement (doi:10.1026/0012-1924/a000331), 2024-04-08
Supplement: 0012-1924_a000331_esm3.pdf [file 0012-1924_a000331_esm3.pdf]

**ESM 3.** Itemkennwerte des MindYou (Erhebung 1,  $N = 400$ )

| Item                    | Faktoren   |            |            |            |            | $h^2$ | $M$  | $SD$ | $r_{i(t-i)}$ | $p_i$ |
|-------------------------|------------|------------|------------|------------|------------|-------|------|------|--------------|-------|
|                         | $F_1$      | $F_2$      | $F_3$      | $F_4$      | $F_5$      |       |      |      |              |       |
| 30                      | <b>.74</b> | -.01       | .05        | -.14       | .12        | .59   | 2.31 | .86  | .59          | .56   |
| 25                      | <b>.69</b> | -.02       | -.06       | .13        | -.10       | .46   | 2.72 | .91  | .54          | .43   |
| 16                      | <b>.49</b> | -.06       | .00        | .13        | -.08       | .25   | 2.63 | .93  | .40          | .46   |
| 3                       | <b>.48</b> | .17        | -.04       | .01        | .12        | .36   | 2.24 | .83  | .44          | .59   |
| 12                      | .00        | <b>.83</b> | .04        | -.10       | -.05       | .60   | 1.84 | .70  | .55          | .72   |
| 10                      | .01        | <b>.67</b> | .07        | -.15       | -.04       | .40   | 2.11 | .95  | .45          | .63   |
| 24                      | -.02       | <b>.39</b> | .09        | .16        | .02        | .30   | 2.18 | .86  | .39          | .61   |
| 1                       | -.05       | .05        | <b>.60</b> | .06        | -.01       | .42   | 2.57 | .76  | .52          | .48   |
| 22                      | -.04       | .05        | <b>.57</b> | .09        | .09        | .45   | 2.88 | .87  | .53          | .37   |
| 27                      | .04        | .06        | <b>.56</b> | .21        | -.04       | .53   | 2.47 | .86  | .56          | .51   |
| 28                      | .01        | .06        | <b>.49</b> | -.13       | .04        | .22   | 2.43 | .91  | .36          | .52   |
| 5                       | .05        | .04        | -.02       | <b>.72</b> | -.09       | .49   | 3.05 | .87  | .54          | .32   |
| 8                       | .02        | -.15       | .01        | <b>.57</b> | .14        | .36   | 2.41 | .87  | .49          | .53   |
| 33                      | .05        | -.21       | .21        | <b>.53</b> | -.06       | .34   | 3.10 | .81  | .42          | .30   |
| 11                      | .00        | <b>.37</b> | -.12       | <b>.51</b> | .04        | .53   | 2.29 | .79  | .50          | .57   |
| 34                      | -.06       | -.04       | -.06       | .15        | <b>.67</b> | .50   | 2.41 | .95  | .48          | .53   |
| 26                      | -.04       | .11        | -.02       | .12        | <b>.59</b> | .49   | 2.20 | .81  | .49          | .60   |
| 17                      | .09        | -.10       | .12        | -.19       | <b>.53</b> | .24   | 2.37 | .91  | .35          | .54   |
| Eigenwerte <sup>a</sup> | 2.29       | 2.74       | 2.77       | 3.32       | 2.51       |       |      |      |              |       |

*Anmerkungen:* Nummerierung der Items entspricht der ursprünglichen Reihenfolge im MindYou. Faktorladungen  $\geq .32$  sind fett gedruckt.  $h^2$  = Kommunalitäten.  $r_{i(t-i)}$  = Item-Trennschärfe für die jeweilige Subskala (Part-whole-korrigierte Item-Skala-Korrelation).  $p_i$  = Item-Schwierigkeitsindex.

<sup>a</sup> Rotierte Summen der quadrierten Ladungen: können nicht addiert werden, um eine Gesamtvarianz zu erhalten, da die Faktoren korreliert sind.
