# Supplementary material for: Konstruktion und explorative Analysen zur Güte des Inventars zur Erfassung von Achtsamkeit bei Jugendlichen
Source: Atypon-hosted journal article supplement (doi:10.1026/0012-1924/a000331), 2024-04-08
Supplement: 0012-1924_a000331_esm4.pdf [file 0012-1924_a000331_esm4.pdf]

**ESM 4. Korrelationsmatrix der Faktoren (Erhebung 1,  $N = 400$ )**

| Faktor                         | 1   | 2   | 3   | 4   |
|--------------------------------|-----|-----|-----|-----|
| 1 Gegenwärtiges Bewusstsein    | -   |     |     |     |
| 2 Bewusstes Handeln            | .26 | -   |     |     |
| 3 Akzeptanz                    | .35 | .45 | -   |     |
| 4 Kognitive Nicht-Reaktivität  | .34 | .51 | .57 | -   |
| 5 Emotionale Nicht-Reaktivität | .40 | .46 | .30 | .56 |
