# Supplementary material for: Konstruktion und explorative Analysen zur Güte des Inventars zur Erfassung von Achtsamkeit bei Jugendlichen
Source: Atypon-hosted journal article supplement (doi:10.1026/0012-1924/a000331), 2024-04-08
Supplement: 0012-1924_a000331_esm5.pdf [file 0012-1924_a000331_esm5.pdf]

**ESM 5.** Rangkorrelationen nach Spearman und interne Konsistenzen für alle Skalen des MindYou und des SDQ (Erhebung 1,  $N = 400$ )

| Skala      | 1       | 2       | 3       | 4       | 5       | 6             | 7      | 8       | 9       | 10     | 11   | 12  |
|------------|---------|---------|---------|---------|---------|---------------|--------|---------|---------|--------|------|-----|
| 1 MY-AK    | .70     |         |         |         |         |               |        |         |         |        |      |     |
| 2 MY-BH    | .19***  | .64     |         |         |         |               |        |         |         |        |      |     |
| 3 MY-GB    | .27***  | .40***  | .70     |         |         |               |        |         |         |        |      |     |
| 4 MY-NR/K  | .32***  | .34***  | .49***  | .70     |         |               |        |         |         |        |      |     |
| 5 MY-NR/E  | .29***  | .26***  | .26***  | .43***  | .63     |               |        |         |         |        |      |     |
| 6 MY-GS    | .60***  | .64***  | .71***  | .74***  | .65***  | .83           |        |         |         |        |      |     |
| 7 SDQ-EP   | -.38*** | -.22*** | -.52*** | -.52*** | -.33*** | <b>-.57††</b> | .71    |         |         |        |      |     |
| 8 SDQ-VA   | -.16**  | -.23*** | -.24*** | -.12*   | -.37*** | <b>-.33††</b> | .15**  | .40     |         |        |      |     |
| 9 SDQ-HYP  | -.15**  | -.53*** | -.38*** | -.33*** | -.37*** | <b>-.51††</b> | .19*** | .40***  | .72     |        |      |     |
| 10 SDQ-PG  | -.22*** | .03     | -.22*** | -.15**  | -.16**  | <b>-.22††</b> | .33*** | .13*    | .11     | .47    |      |     |
| 11 SDQ-PRO | .07     | .19***  | .06     | .06     | .12*    | <b>.10†</b>   | -.07   | -.27*** | -.19*** | -.13*  | .67  |     |
| 12 SDQ-GP  | -.36*** | -.41*** | -.57*** | -.48*** | -.49*** | <b>-.68††</b> | .73*** | .57***  | .66***  | .49*** | -.17 | .74 |

*Anmerkungen:* In der Diagonalen sind die internen Konsistenzen (Cronbachs  $\alpha$ ) abgedruckt. Einseitige Korrelationstest wurden fett markiert. AK = Akzeptanz/ nicht-urteilende Haltung, BH = Bewusstes Handeln, GB = Gegenwärtiges Bewusstsein, NR/K = Kognitive Nicht-Reaktivität, NR/E = Emotionale Nicht-Reaktivität, GS = Achtsamkeitsgesamtscore, EP = Emotionale Probleme, VA = Externalisierende Verhaltensauffälligkeiten, HYP = Hyperaktivität/Aufmerksamkeitsprobleme, PG = Probleme mit Gleichaltrigen, PRO = Prosoziales Verhalten, GP = Gesamtproblemwert.

\*  $p < .05$  (zweiseitig). \*\*  $p < .01$  (zweiseitig). \*\*\*  $p < .001$  (zweiseitig). †  $p < .05$  (einseitig). ††  $p < .001$  (einseitig)
