# Supplementary material for: Konstruktion und explorative Analysen zur Güte des Inventars zur Erfassung von Achtsamkeit bei Jugendlichen
Source: Atypon-hosted journal article supplement (doi:10.1026/0012-1924/a000331), 2024-04-08
Supplement: 0012-1924_a000331_esm6.pdf [file 0012-1924_a000331_esm6.pdf]

**ESM 6.** Rangkorrelationen nach Spearman für MindYou-Skalen und Schulerfolg (Erhebung 1,  $N = 400$ )

|   | Skala   | Noten –<br>Ø           | Note<br>Deutsch | Note<br>Mathe | Note<br>Englisch |
|---|---------|------------------------|-----------------|---------------|------------------|
| 1 | MY-AK   | -.01                   | .04             | <.01          | -.04             |
| 2 | MY-BH   | .28***                 | .18***          | .25***        | .21***           |
| 3 | MY-GB   | .11*                   | -.09            | .12*          | .05              |
| 4 | MY-NR/K | .13*                   | .09             | .14**         | .06              |
| 5 | AI-NR/E | .07                    | -.02            | .08           | .07              |
| 6 | MY-GS   | <b>.18<sup>†</sup></b> | .11*            | .19***        | .12*             |

*Anmerkungen:* Ø = Durchschnitt (berechnet aus Deutsch-, Mathe- und Englischnotenpunkten). Im Rahmen der Notenskala entspricht 1 = ungenügend und 15 = sehr gut. Bei den Mind-You Werten handelt es sich um die rekodierten Daten, d. h. hohe Testwerte entsprechen einer hohen Merkmalsausprägung. Der einseitige Korrelationstest wurde fett markiert.

\*  $p < .05$  (zweiseitig). \*\*  $p < .01$  (zweiseitig). \*\*\*  $p < .001$  (zweiseitig). <sup>†</sup>  $p < .001$  (einseitig).
